# Supplementary material for: Geotechnical Investigation for the Groundwater Damage Analysis of the Shahe Ancient Bridge Site in Xi’an, China
Source: Research Square preprint supplement (doi:10.21203/rs.3.rs-141276/v1), 2021-01-09
Supplement: Supplementary file 1 [file f7dbb7683483e985b06674b4.docx]

Highlights

1. The stratigraphy revealed correlation with status of the ruins.
2. Ruins with its environment were an inalienable and closely linked ecosystem.
3. Find breakthrough in the correlation between environment and causes of diseases.
4. Groundwater was the greatest factor affected destruction of the ruins.
5. Fluctuations in groundwater level influenced and accelerated the movement of salt.
